# Supplementary material for: One-pot production of porous assemblies by PISA of star architecture copolymers: a simulation study
Source: Royal Society of Chemistry journal article supplement (doi:10.1039/c8cp00480c), 2018-01-01
Supplement: c8cp00480c5.pdf [file c8cp00480c5.pdf]

*Supporting Information for:*

One-Pot route to produce the porous assemblies by the PISA of  
star architecture copolymers: A simulation study

Junfeng Wang<sup>1</sup>, Jiawei Li<sup>1</sup>, Qiang Yao<sup>1</sup>, Xiaoli Sun<sup>1</sup>, Youguo Yan<sup>1</sup>, and Jun Zhang<sup>1,\*</sup>

<sup>1</sup>College of Science, China University of Petroleum (East China), Qingdao, Shandong  
266580, People's Republic of China

\*Corresponding Authors, Email: [zhangjun.upc@gmail.com](mailto:zhangjun.upc@gmail.com) (J. Zhang).

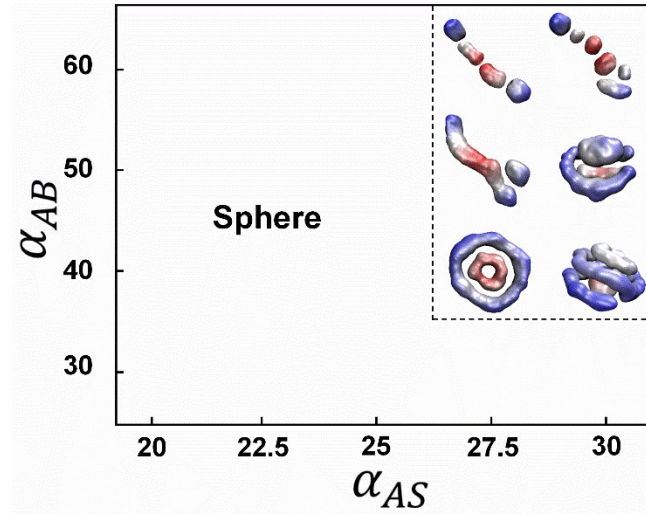

**Fig. S1.** The morphology phase diagram formed by the PISA of  $A_3B_{12}$  linear copolymers at  $\alpha_{BS} = 60$  in terms of different repulsion interaction parameters  $\alpha_{AS}$  and  $\alpha_{AB}$ .

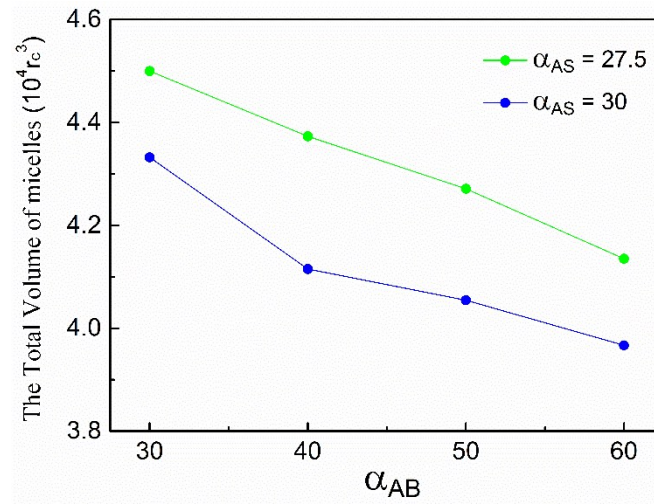

**Fig. S2.** The total volume of micelles formed by the PISA of  $A_3(B_6)_2$  at different  $\alpha_{AS}$  and  $\alpha_{AB}$ .

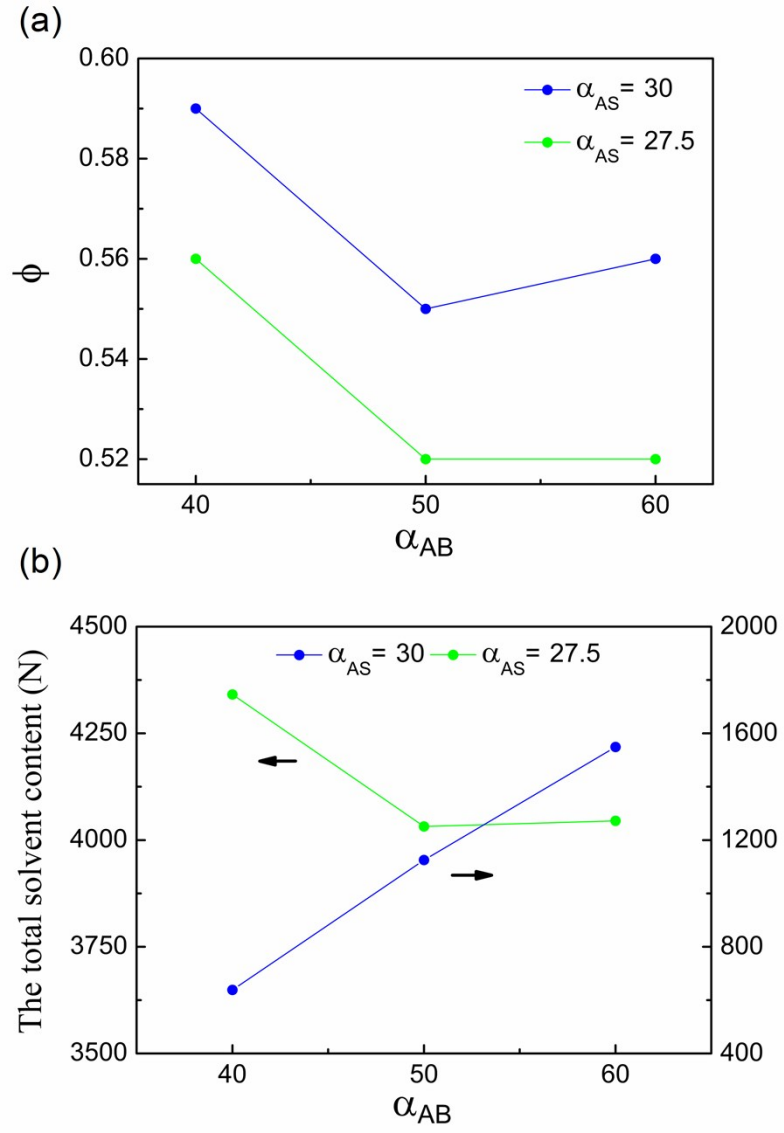

**Fig. S3.** (a) The number of the solvophilic blocks in the micelles ( $\phi$ ) with different  $\alpha_{AS}$  and  $\alpha_{AB}$ . (b) The total solvent content with different  $\alpha_{AS}$  and  $\alpha_{AB}$ .

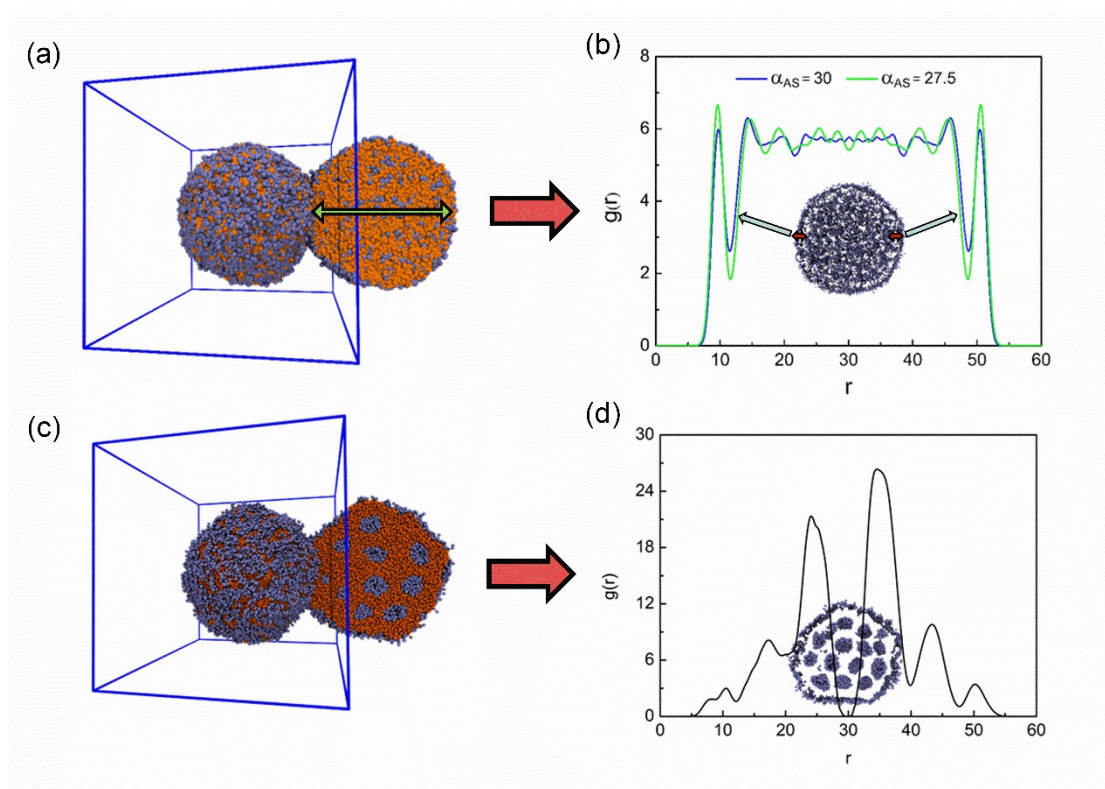

**Fig. S4.** (a) The self-assembly morphology and its section of star architecture copolymers at  $\alpha_{AB} = 30$ . (b) The radial distribution function of solvophilic blocks at  $\alpha_{AS} = 30$  and  $27.5$ ,  $\alpha_{AB} = 30$ . (c) The self-assembly morphology and its section of the porous vesicle at  $\alpha_{AS} = 30$ ,  $\alpha_{AB} = 60$ . (d) The radial distribution function of solvophilic blocks.

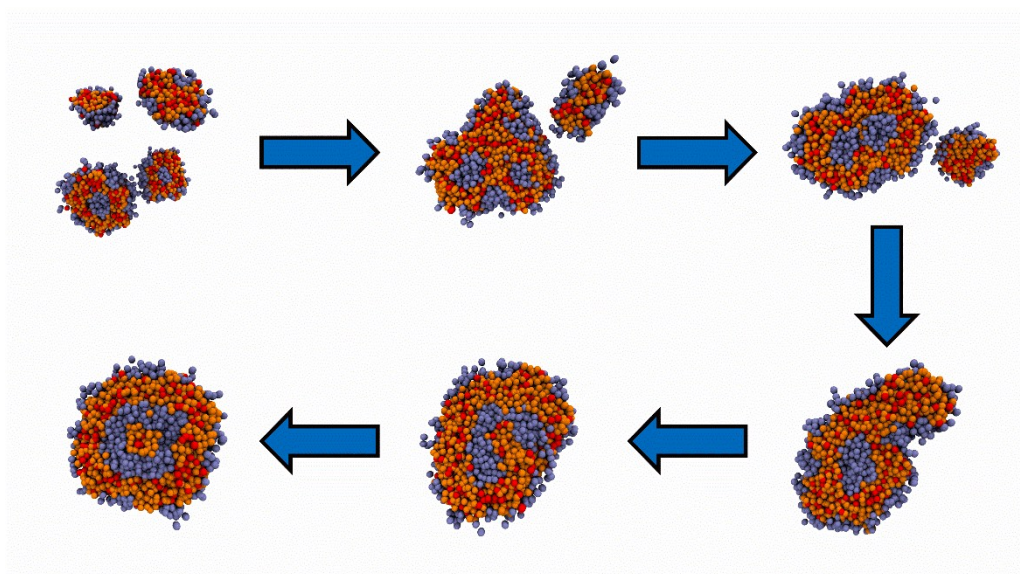

**Fig. S5.** The self-assembly progress of the vesicle with a ring-like cavity.

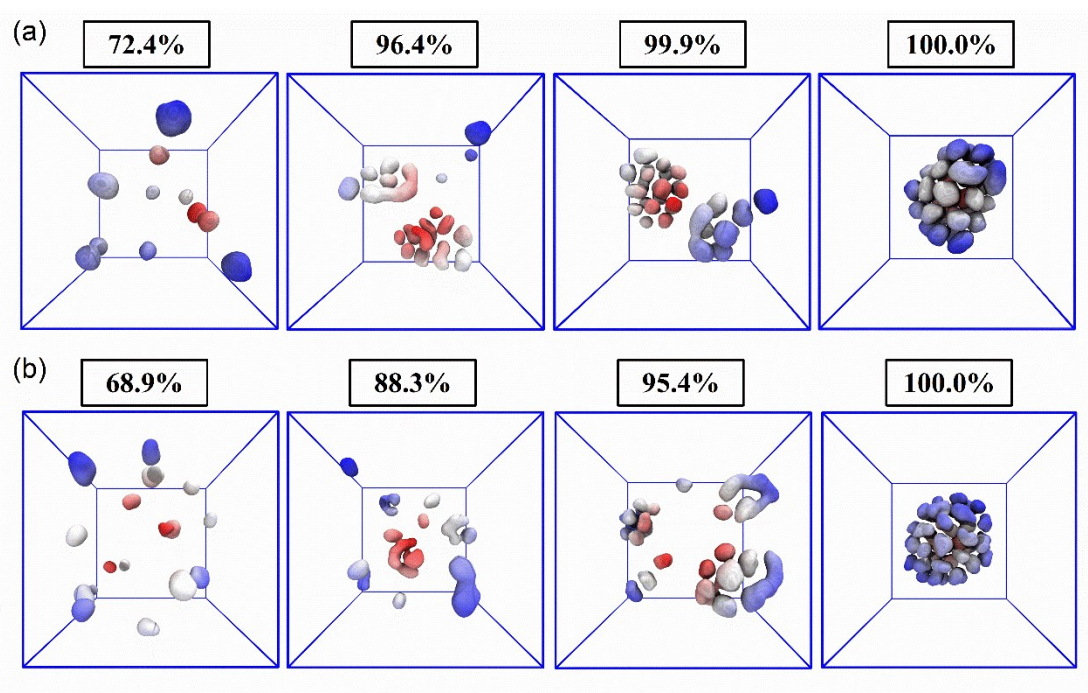

**Fig. S6.** (a) The PISA progress of  $A_3(B_6)_2$  star architecture copolymers at  $\alpha_{AS} = 27.5$  and  $\alpha_{AB} = 50$  with the conversion of monomers increasing. (a) The PISA progress of  $A_3(B_6)_2$  star architecture copolymers at  $\alpha_{AS} = 27.5$  and  $\alpha_{AB} = 40$  with the conversion of monomers increasing.



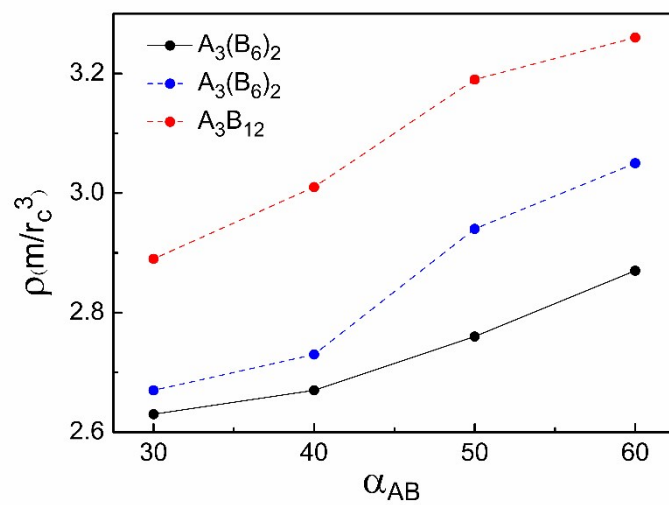

**Fig. S7.** The density of solvophobic blocks in the porous micelles with various  $\alpha_{AB}$  at  $\alpha_{AS} = 30$  (dashed line), and the density of solvophobic blocks with angle restricted with various  $\alpha_{AB}$  at  $\alpha_{AS} = 30$  (solid line).

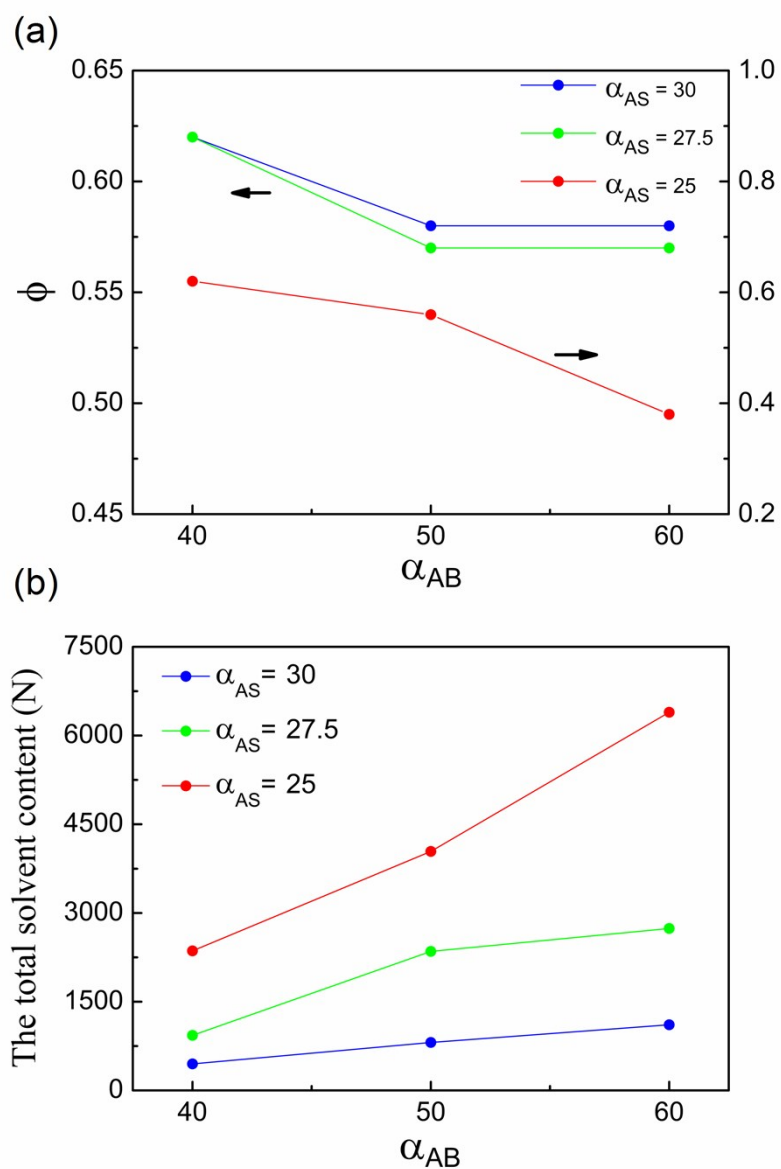

**Fig. S8.** When the angle among the beads closest to the center of star architecture is restricted, (a) The number of the solvophilic blocks in the micelles with different  $\alpha_{AS}$  and  $\alpha_{AB}$ . (b) The solvent possession per solvophilic block in the micelles with different  $\alpha_{AS}$  and  $\alpha_{AB}$ . (c) The total solvent content with different  $\alpha_{AS}$  and  $\alpha_{AB}$ .

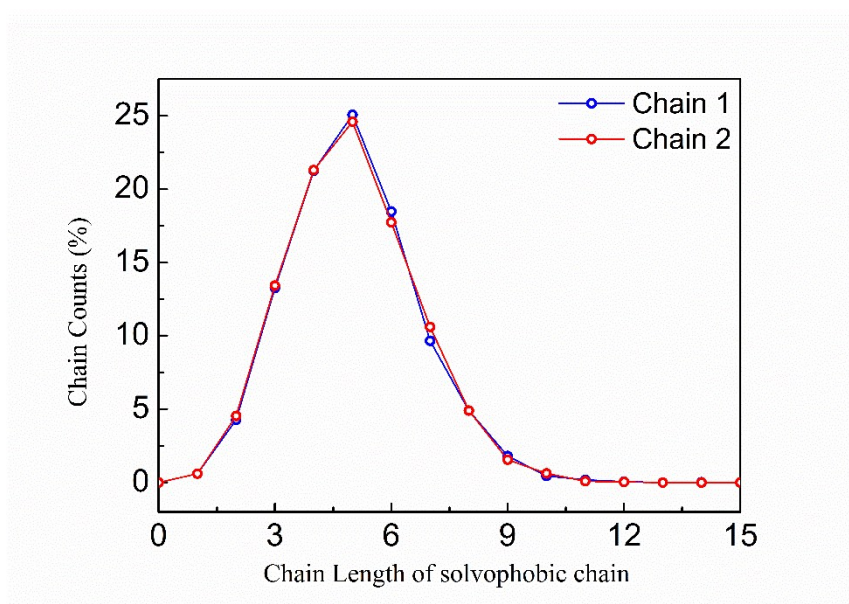

**Fig. S9.** The chain length distribution of two solvophobic chains of star architecture copolymer (Take the condition of  $\alpha_{AS} = 30$ ,  $\alpha_{AB} = 60$  as the example).

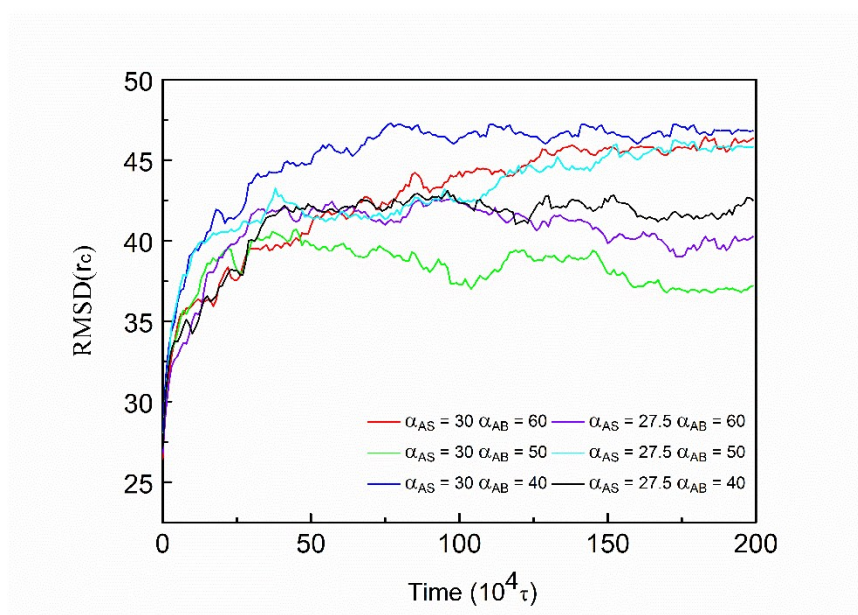

**Fig. S10.** The root-mean-square deviation (RMSD) of star architecture copolymers over time at various  $\alpha_{AS}$  and  $\alpha_{AB}$ .



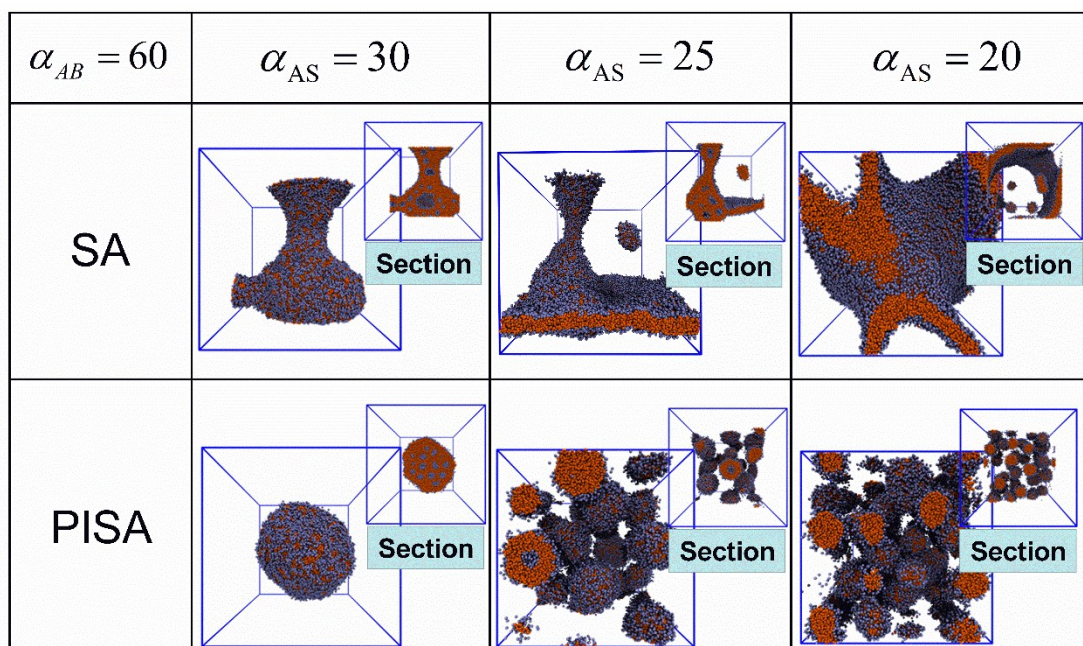

**Fig. S11.** The morphologies obtained by PISA and self-assembly of amphiphilic copolymers with the same chain length distribution at various  $\alpha_{AS}$  and  $\alpha_{AB}$ .

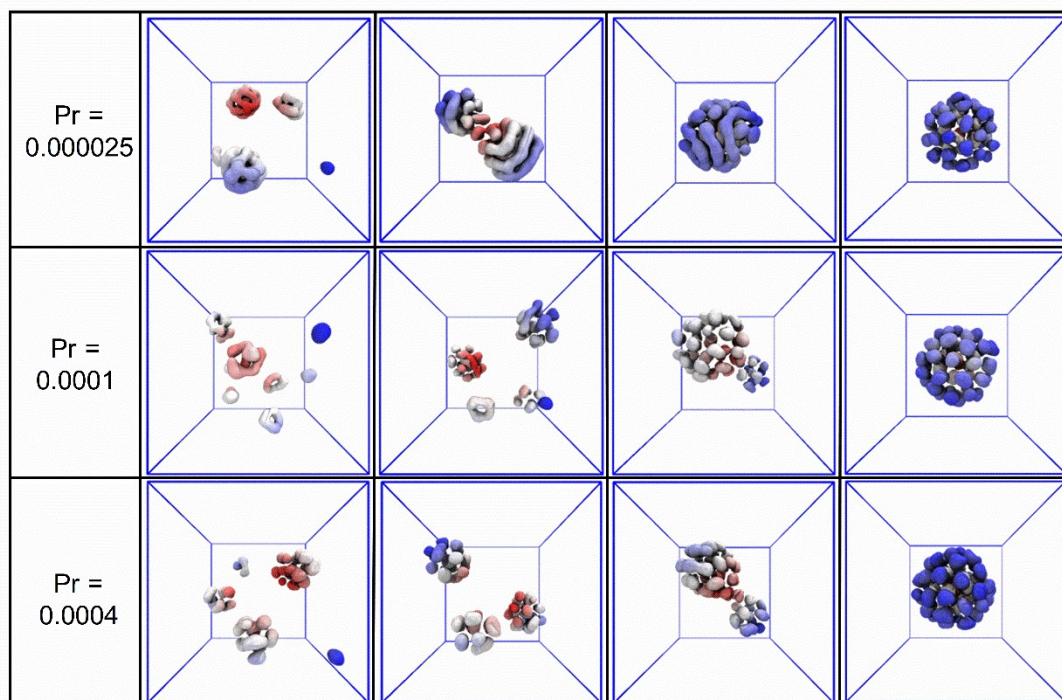

**Fig. S12.** The self-assembly progress of PISA at different polymerization rate ( $P_r$ ).
